- Kredel M, Biedler A, Sessler DI, Roewer N, IMPACT Investigators: A factorial trial of six interventions for the prevention of postoperative nausea and vomiting. *N Engl J Med* 2004; 350:2441-51
20. Wildgaard K, Ravn J, Kehlet H: Chronic post-thoracotomy pain: A critical review of pathogenic mechanisms and strategies for prevention. *Eur J Cardiothorac Surg* 2009; 36:170-80
  21. Brandsborg B, Nikolajsen L, Hansen CT, Kehlet H, Jensen TS: Risk factors for chronic pain after hysterectomy: A nationwide questionnaire and database study. *ANESTHESIOLOGY* 2007; 106:1003-12
  22. Gärtner R, Jensen MB, Nielsen J, Ewertz M, Kroman N, Kehlet H: Prevalence of and factors associated with persistent pain following breast cancer surgery. *JAMA* 2009; 302:1985-92
  23. Perkins FM, Kehlet H: Chronic pain as an outcome of surgery. A review of predictive factors. *ANESTHESIOLOGY* 2000; 93:1123-33
  24. Henzi I, Walder B, Tramèr MR: Dexamethasone for the prevention of postoperative nausea and vomiting: A quantitative systematic review. *Anesth Analg* 2000; 90:186-94
  25. Coello R, Charlett A, Wilson J, Ward V, Pearson A, Borriello P: Adverse impact of surgical site infections in English hospitals. *J Hosp Infect* 2005; 60:93-103
  26. Burke JF: The effective period of preventive antibiotic action in experimental incisions and dermal lesions. *Surgery* 1961; 50:161-8
  27. Maheshwari A, Abdelmalak B, Mascha EJ, Kirkova Y, Sessler DI: The Effect of Steroids on Surgery-Induced Hyperglycemia in Diabetics and Non-Diabetics. Presented at the Annual Meeting of American Society of Anesthesiologists 2010, San Diego, CA 1175
  28. Duncan AE, Abd-Elseyed A, Maheshwari A, Xu M, Soltesz E, Koch CG: Role of intraoperative and postoperative blood glucose concentrations in predicting outcomes after cardiac surgery. *ANESTHESIOLOGY* 2010; 112:860-71

## ANESTHESIOLOGY REFLECTIONS

### Block-ing Pain with Jiffy Toothache Drops

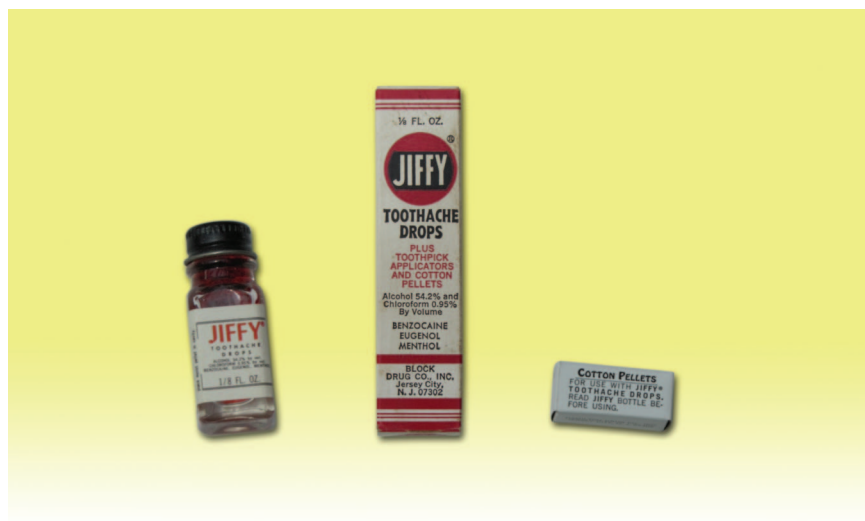

Founded in Brooklyn, New York, in 1907 by Lithuanian-American pharmacist Alexander Block, the Block Drug Company shifted its headquarters in 1938 to nearby Jersey City, New Jersey. From there it produced or distributed dozens of products, including “Jiffy Toothache Drops” (above) which featured a topical anesthetic blend of benzocaine, eugenol, and menthol. (Of course the accompanying mix of chloroform in “54.2% Alcohol” also helped relieve dental pain in a “Jiffy” ....) After the founder’s death in 1953, Block Drug was run by his family, then traded publicly from 1971–2001, and finally sold to a pharmaceutical giant. (Copyright © the American Society of Anesthesiologists, Inc. This image also appears in the *Anesthesiology Reflections* online collection available at [www.anesthesiology.org](http://www.anesthesiology.org).)

George S. Bause, M.D., M.P.H., Honorary Curator, ASA’s Wood Library-Museum of Anesthesiology, Park Ridge, Illinois, and Clinical Associate Professor, Case Western Reserve University, Cleveland, Ohio. [UJYC@aol.com](mailto:UJYC@aol.com).
